# Supplementary material for: Risk of hospitalization for hypoglycemia among older Korean people with diabetes mellitus: Interactions between treatment modalities and comorbidities
Source: PubMed Central journal article supplement (PMC5079314; doi:10.1097/md.0000000000005016), 2016-10-21
Supplement: medi-95-e5016-s001.pdf [file medi-95-e5016-s001.pdf]

**Supplementary Table 1. Comorbid condition definitions and diagnosis codes**

| Condition                 | ICD-10 codes                                                                                                 |
|---------------------------|--------------------------------------------------------------------------------------------------------------|
| Hypertension              | I10, I11, I12, I13, I15                                                                                      |
| Dyslipidemia              | E78                                                                                                          |
| Cerebrovascular diseases  | I60, I61, I62, I63, I64, I69                                                                                 |
| Ischemic heart diseases   | I20-I25                                                                                                      |
| Heart failure             | I50, I110, I130, I132                                                                                        |
| Chronic kidney disease    | N18, N19                                                                                                     |
| Chronic liver disease     | B18, K70, K71.3-5, K71.7, K72.1, K72.9, K73, K74, K76                                                        |
| Dementia                  | F00, F01, F02, F03                                                                                           |
| Cancer                    | Cxx.x                                                                                                        |
| Alcohol-related disorders | E24.4, E52, F10.x, G31.2, G62.1, G72.1, I42.6, K29.2, K70.x, K85.2, K86.0, R78.0, T51.9, Z71.4, Z72.1, Z86.4 |

International Classification of Disease, Tenth Revision.
